# Supplementary material for: Development of Novel 1,3-Disubstituted-2-Thiohydantoin Analogues with Potent Anti-Inflammatory Activity; In Vitro and In Silico Assessments
Source: MDPI journal article supplement (doi:10.3390/molecules27196271), 2022-09-23
Supplement: s1 [file s1]

# **Supporting Information**

**Development of Novel 1,3-Disubstituted-2-Thiohydantoin Analogues with Potent Anti-Inflammatory Activity; *In Vitro* and *In Silico* Assessments**

Salma M. Khirallah <sup>1</sup>, Heba M. M. Ramadan <sup>2</sup>, Ahmed Shawky <sup>3</sup>, Safa H Qahl <sup>4</sup>,  
Roua S. Baty <sup>5</sup>, Nada Alqadri <sup>6</sup>, Amnah Mohammed Alsuhaibani <sup>7</sup>, Mariusz Jaremko <sup>8</sup>,  
Abdul-Hamid Emwas <sup>9</sup>, and Essa M. Saied <sup>10,11,\*</sup>

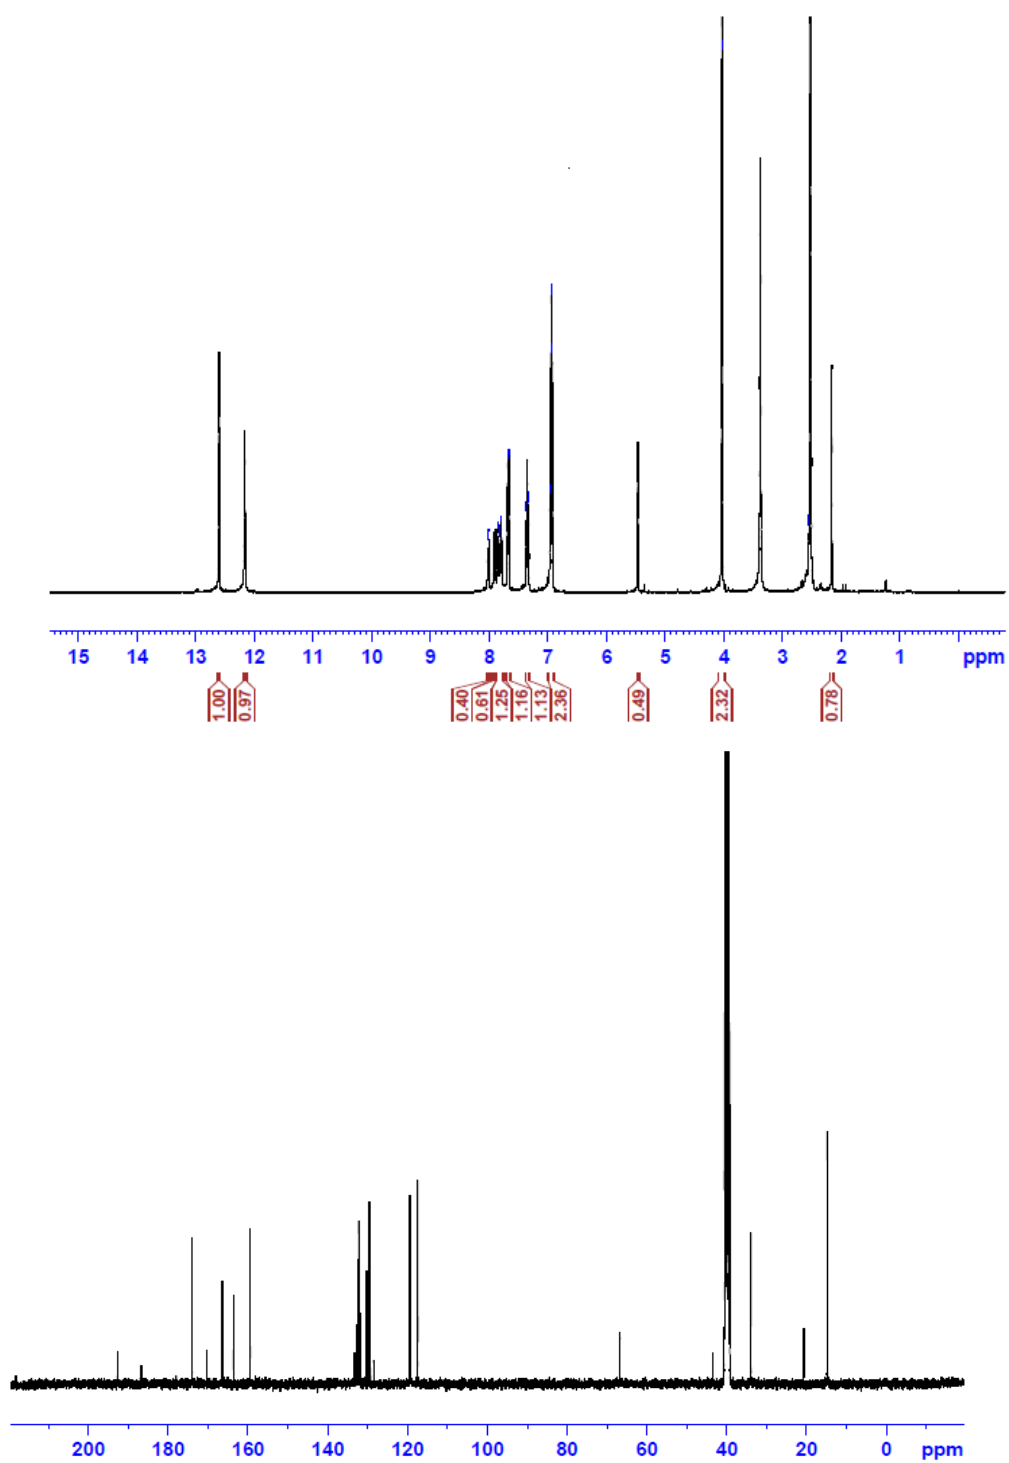

Figure S1a. <sup>1</sup>H-NMR and <sup>13</sup>C-NMR spectra of compound 3 in DMSO-*d*<sub>6</sub>.

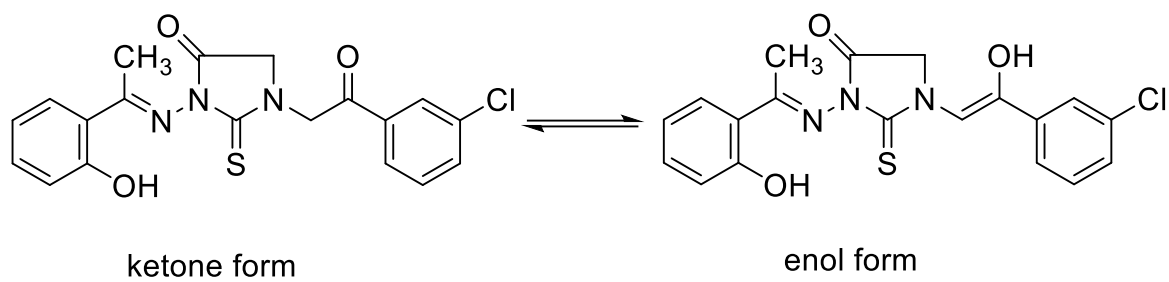

**Figure S1b:** The keto-enol tautomer of compound **3**.

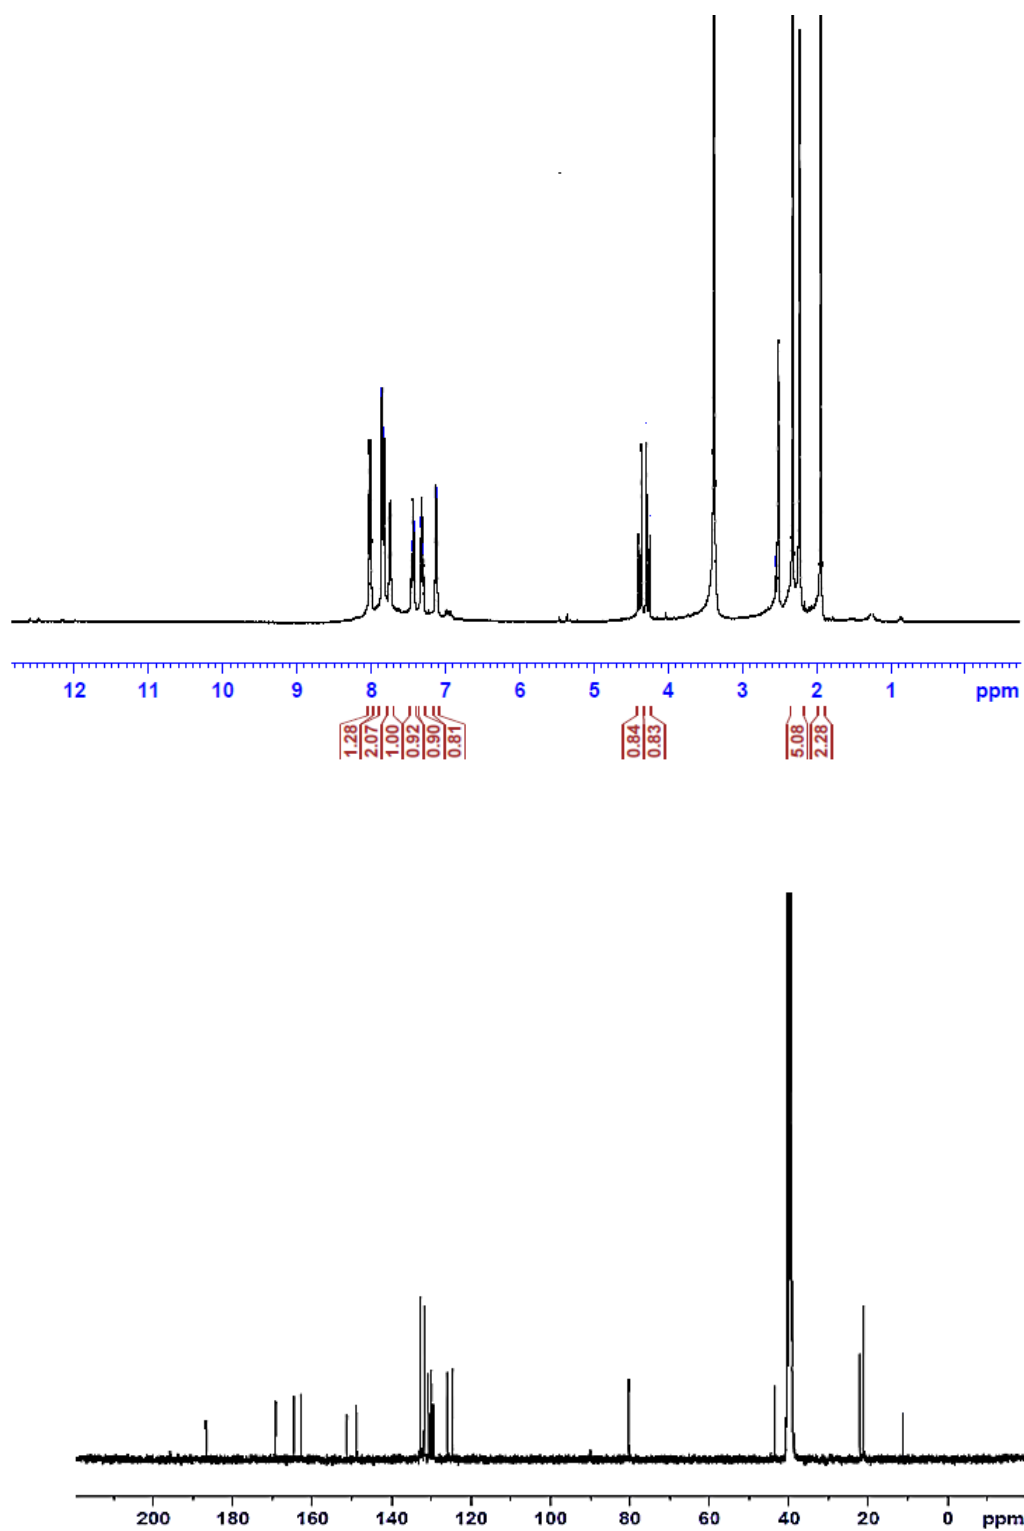

Figure S2. <sup>1</sup>H-NMR and <sup>13</sup>C-NMR spectra of compound 4 in DMSO-*d*<sub>6</sub>.

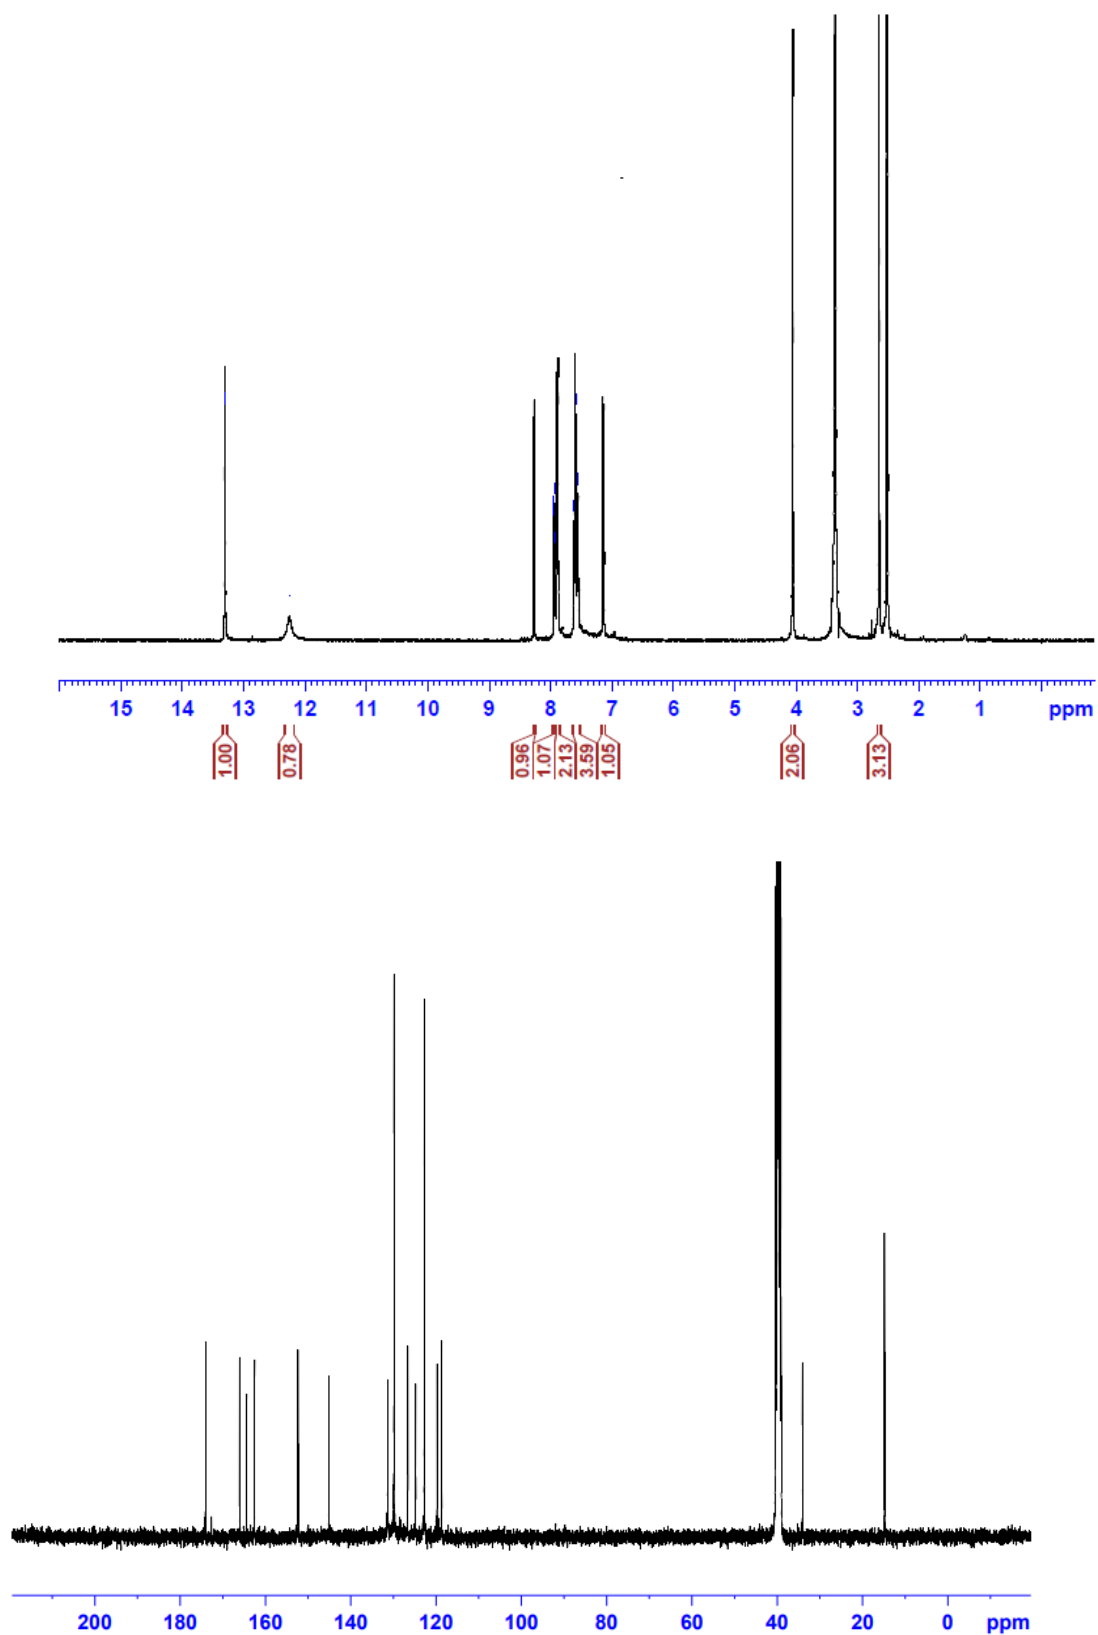

Figure S3. <sup>1</sup>H-NMR and <sup>13</sup>C-NMR spectra of compound 5 in DMSO-*d*<sub>6</sub>.

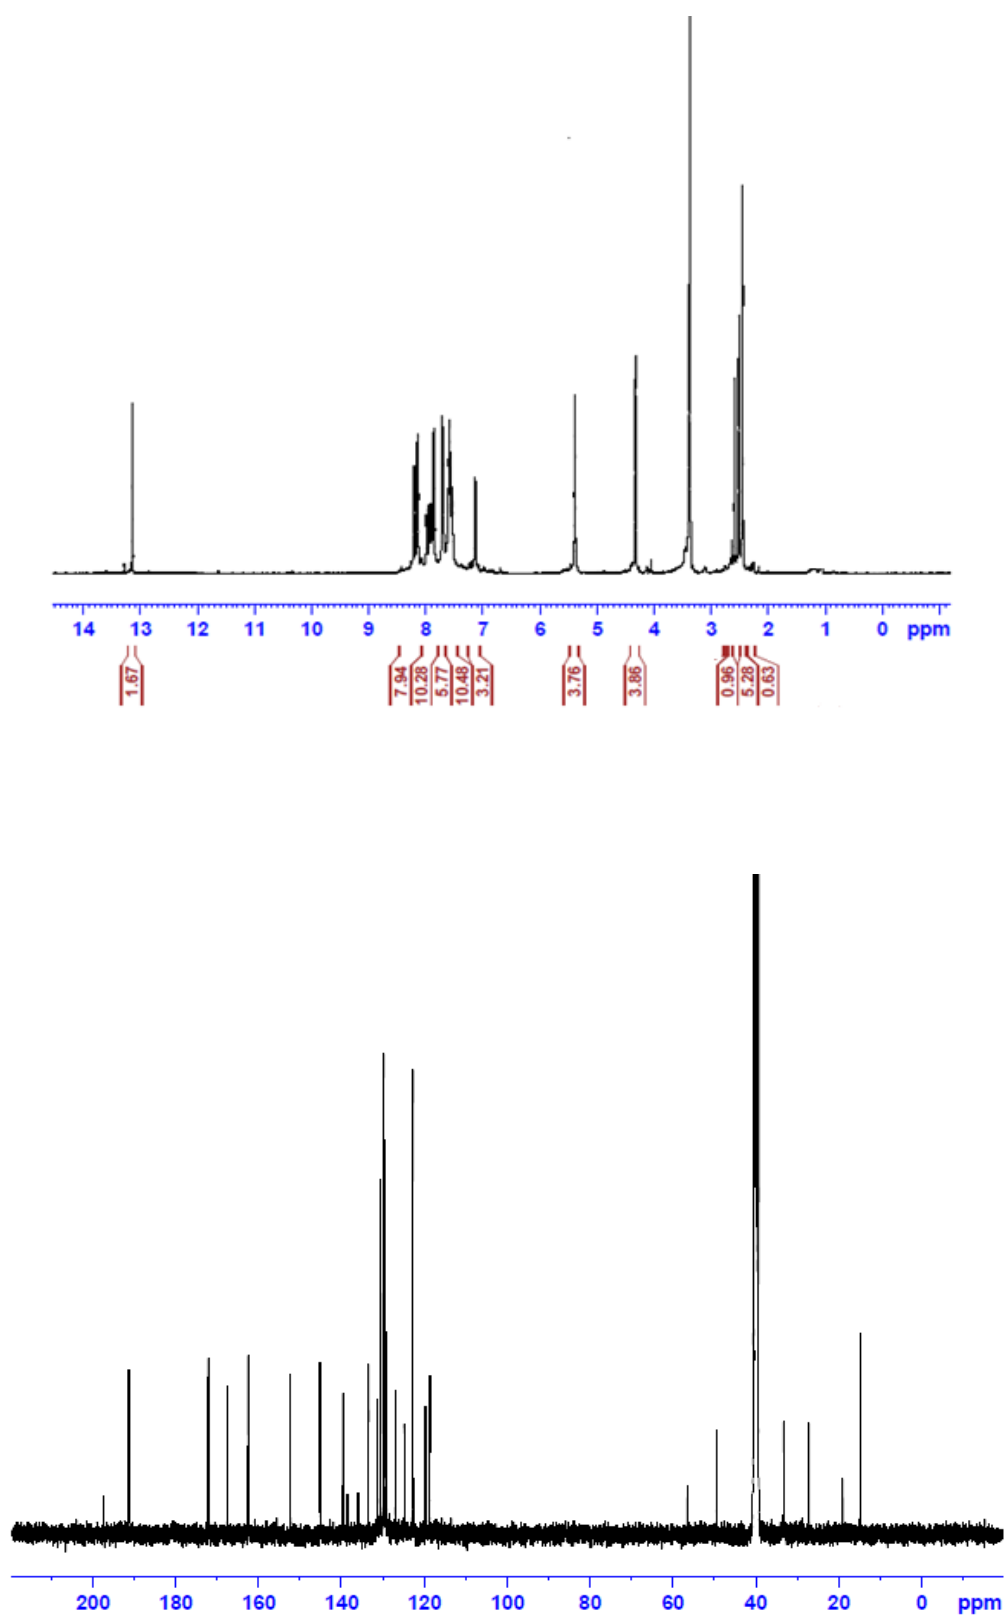

Figure S4. <sup>1</sup>H-NMR and <sup>13</sup>C-NMR spectra of compound 6 in DMSO-*d*<sub>6</sub>.

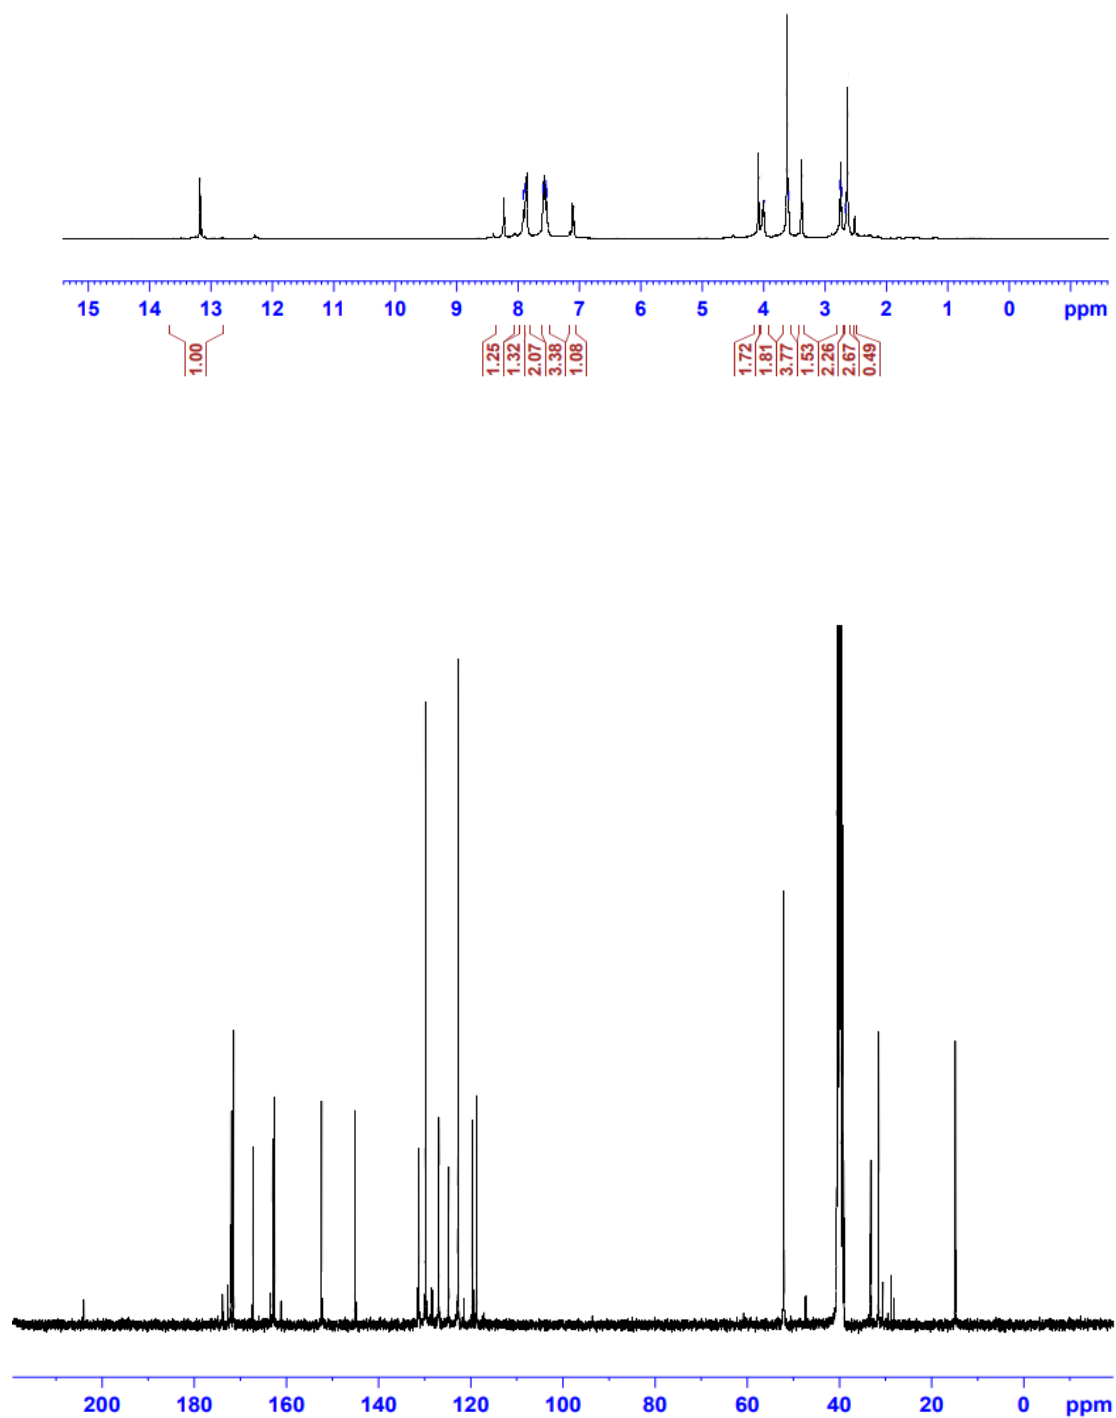

Figure S5. <sup>1</sup>H-NMR and <sup>13</sup>C-NMR spectra of compound 7 in DMSO-*d*<sub>6</sub>.

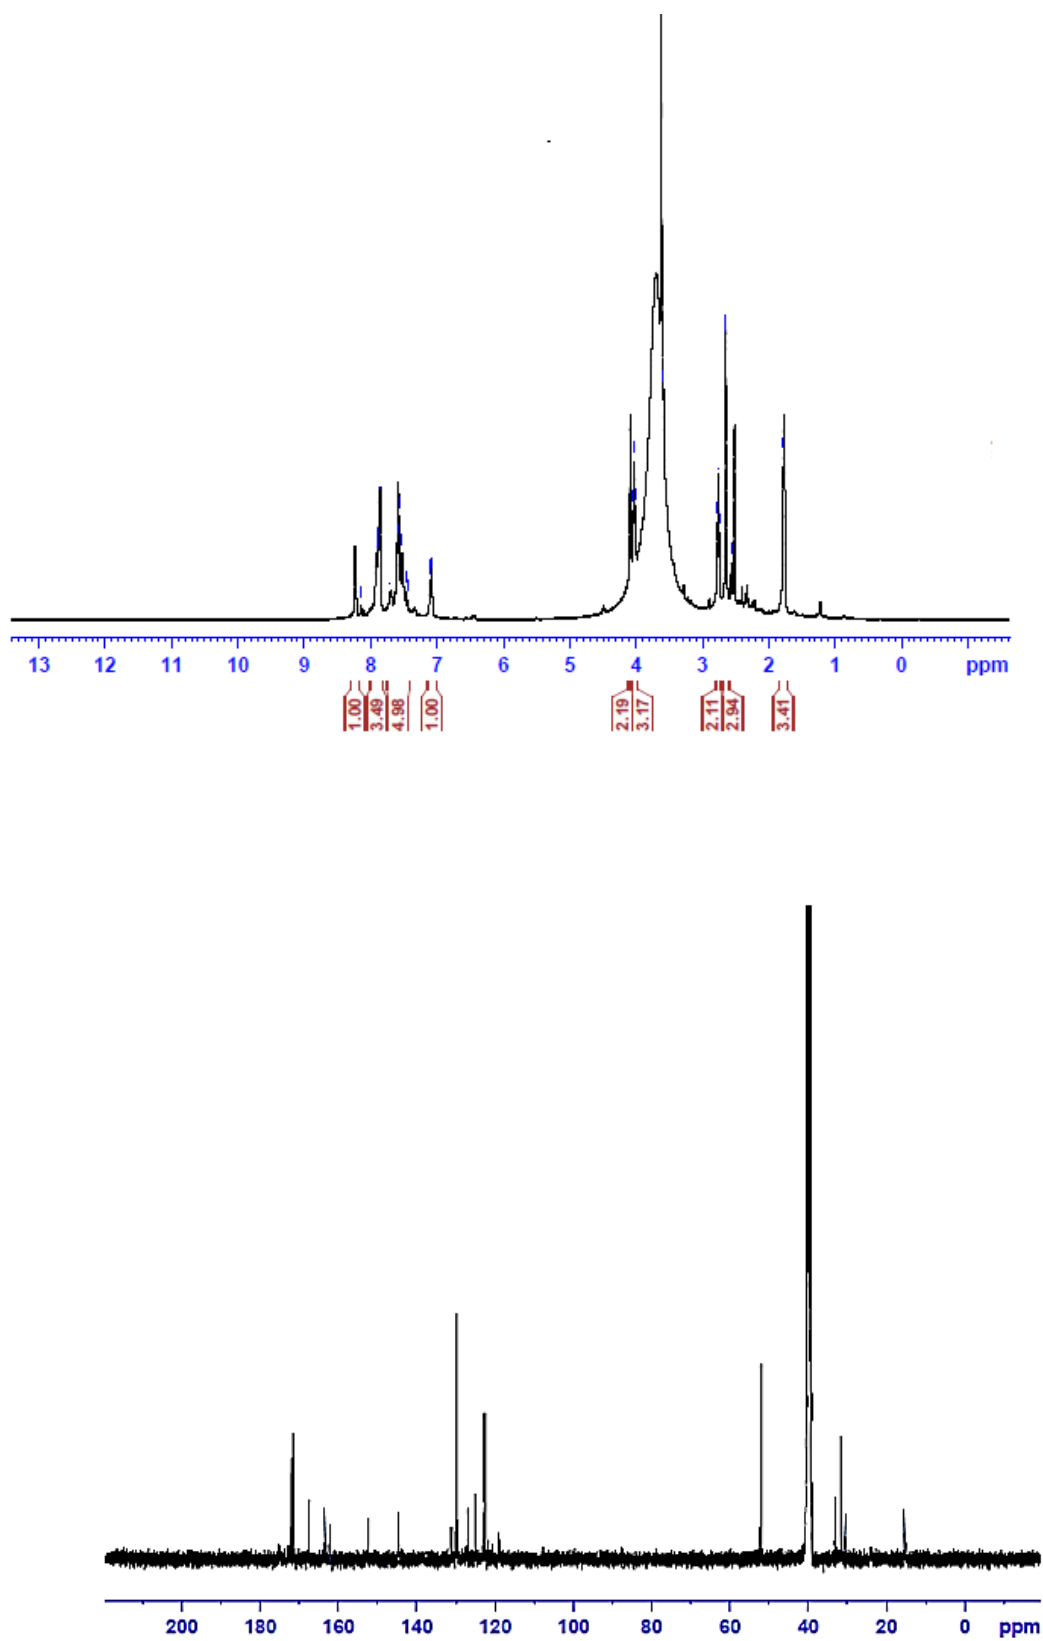

Figure S6. <sup>1</sup>H-NMR and <sup>13</sup>C-NMR spectra of compound 8 in DMSO-*d*<sub>6</sub>.



**Table S1: *In vitro* cytotoxicity of 1,3 disubstituted-2-thioxoimidazolidin-4-one derivatives against LPS-induced RAW264.7.**

**Compound 3**

| log conc. | % viability |
|-----------|-------------|
| 3         | 45.09       |
| 2.398     | 54.99       |
| 1.799     | 67.86       |
| 1.204     | 78.37       |
| 0.6       | 90.78       |

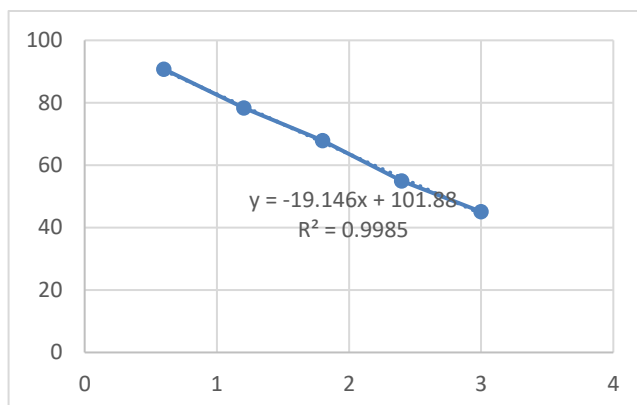

**Compound 4**

| log conc. | % viability |
|-----------|-------------|
| 3         | 43.27       |
| 2.39794   | 51.55       |
| 1.79934   | 63.07       |
| 1.20412   | 72.57       |
| 0.6       | 84.35       |

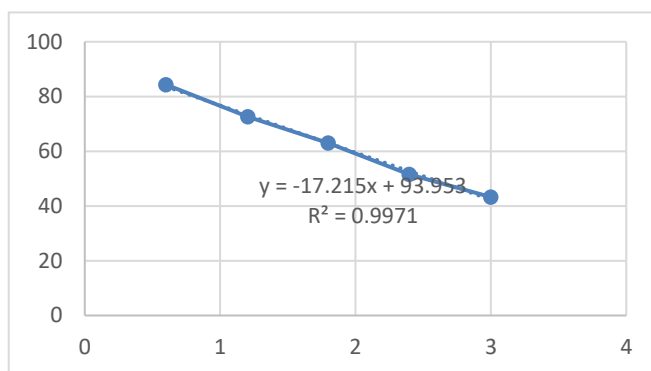

**Compound 5**

| log conc. | % viability |
|-----------|-------------|
| 3         | 39.26       |
| 2.398     | 47.99       |
| 1.799     | 58.86       |
| 1.204     | 68.82       |
| 0.6       | 80.66       |

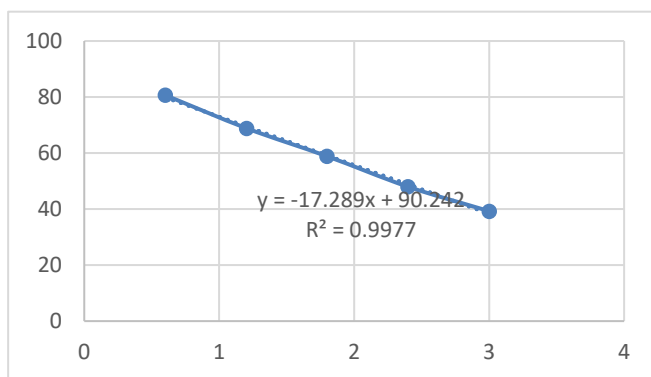

**Compound 6**

| log conc. | % viability |
|-----------|-------------|
| 3         | 41.6        |
| 2.39794   | 49.25       |
| 1.79934   | 61.26       |
| 1.20412   | 66.48       |
| 0.6       | 77.99       |

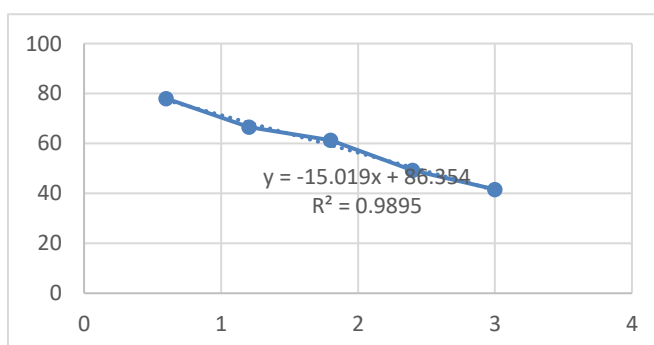

### Compound 7

| log conc. | % viability |
|-----------|-------------|
| 3         | 40.06       |
| 2.39794   | 48.44       |
| 1.79934   | 55.83       |
| 1.20412   | 66.26       |
| 0.6       | 78.9        |

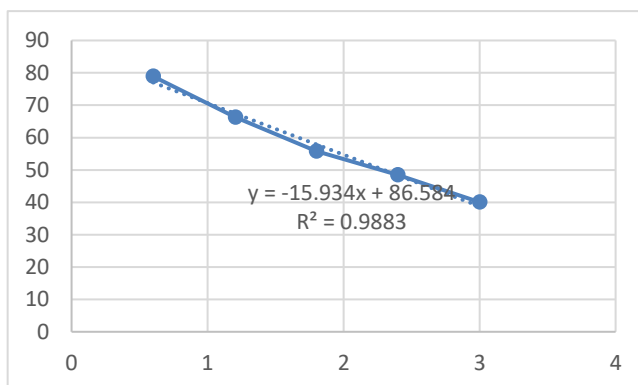

### Compound 8

| log conc. | % viability |
|-----------|-------------|
| 3         | 41.54       |
| 2.398     | 53.67       |
| 1.799     | 63.56       |
| 1.204     | 73.13       |
| 0.6       | 84.83       |

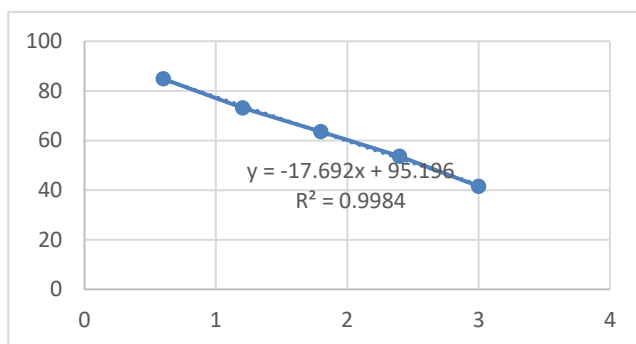

### CXB

| log conc. | % viability |
|-----------|-------------|
| 3         | 41.32       |
| 2.398     | 48.25       |
| 1.799     | 59.79       |
| 1.204     | 70.51       |
| 0.6       | 79.25       |

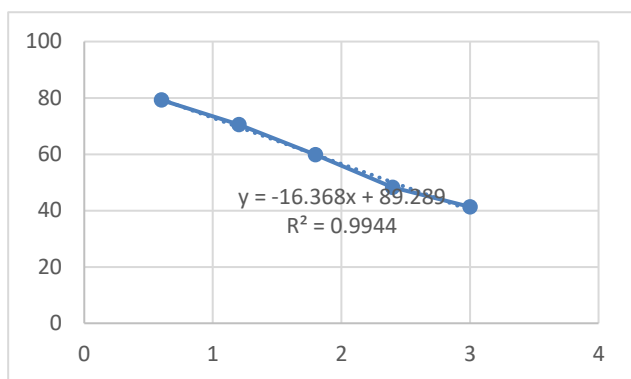

**Table S2: Effect of compound 7 on IL-6 and TNF- $\alpha$  expression in RAW264.7 by RT-PCR.**

|   | LPS-induced raw264.7 cells |               |       |                 |              |
|---|----------------------------|---------------|-------|-----------------|--------------|
|   | Sample                     |               |       | Gene Expression |              |
|   |                            | conc<br>ug/ml | cells | Fold of change  |              |
|   |                            |               |       | IL6             | TNF $\alpha$ |
| 1 | 7                          | 50            |       | 0.276           | 0.314        |
| 2 | Celecoxib                  | 50            |       | 0.353           | 0.484        |
| 3 | Positive Control           | ---           |       | 1               | 1            |

**Table S3: In vitro effect of compound 7 on Western blot analysis of IL-1 $\beta$  in RAW264.7 cells.**

|   | Compound |               |          | western blotting |                |
|---|----------|---------------|----------|------------------|----------------|
|   | code     | conc<br>ug/ml | cells    | IL1B             | $\beta$ -actin |
|   |          |               |          | OD               |                |
| 1 | 7        | 10            | raw264.7 | 0.395            |                |
| 2 | 7        | 50            |          | 0.341            | +              |
| 3 | PC       | ---           |          | 0.709            | +              |

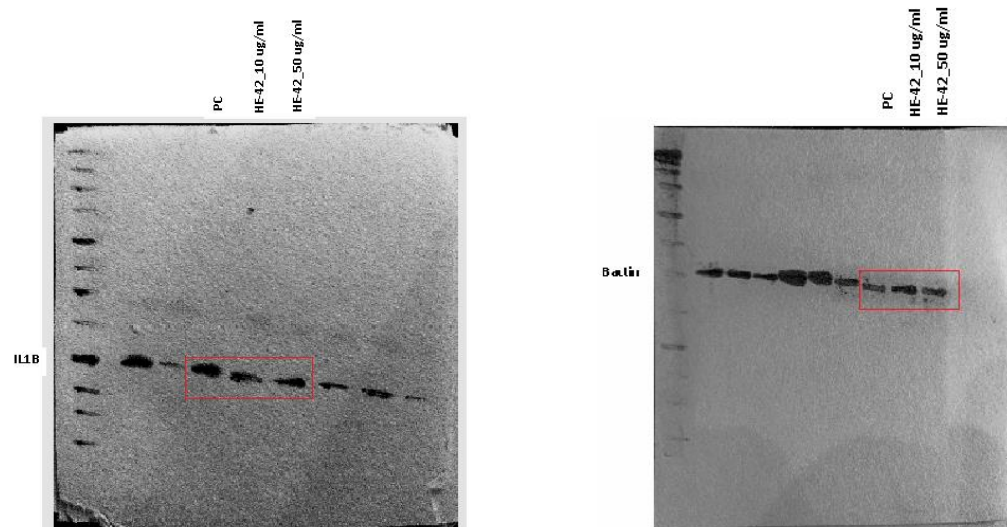

**Figure S7.** Western plot analysis of the *in vitro* Anti-inflammatory effect of compound **7** against LPS- activated RAW264.7 cell line on IL-1 $\beta$  expression.
